# Supplementary material for: Absorption-dominated electromagnetic interference shielding composite foam based on porous and bi-conductive network structures
Source: Royal Society of Chemistry journal article supplement (doi:10.1039/d3ta01369c), 2023-01-01
Supplement: d3ta01369c1.pdf [file d3ta01369c1.pdf]

## Supplementary Information

### Absorption-dominated electromagnetic interference shielding composite foam based on porous and bi-conductive network structure

Qiang Peng<sup>‡</sup>, Meng Ma<sup>‡\*</sup>, Qindan Chu, Hao Lin, Wenting Tao, Wenqin Shao, Si Chen,

Yanqin Shi, Huiwen He, Xu Wang\*

College of Materials Science and Engineering, Zhejiang University of Technology,

Hangzhou 310014, PR China.

E-mail addresses: mameng@zjut.edu.cn; wangxu@zjut.edu.cn

<sup>‡</sup>These authors contributed equally to this work.

\*Corresponding authors.

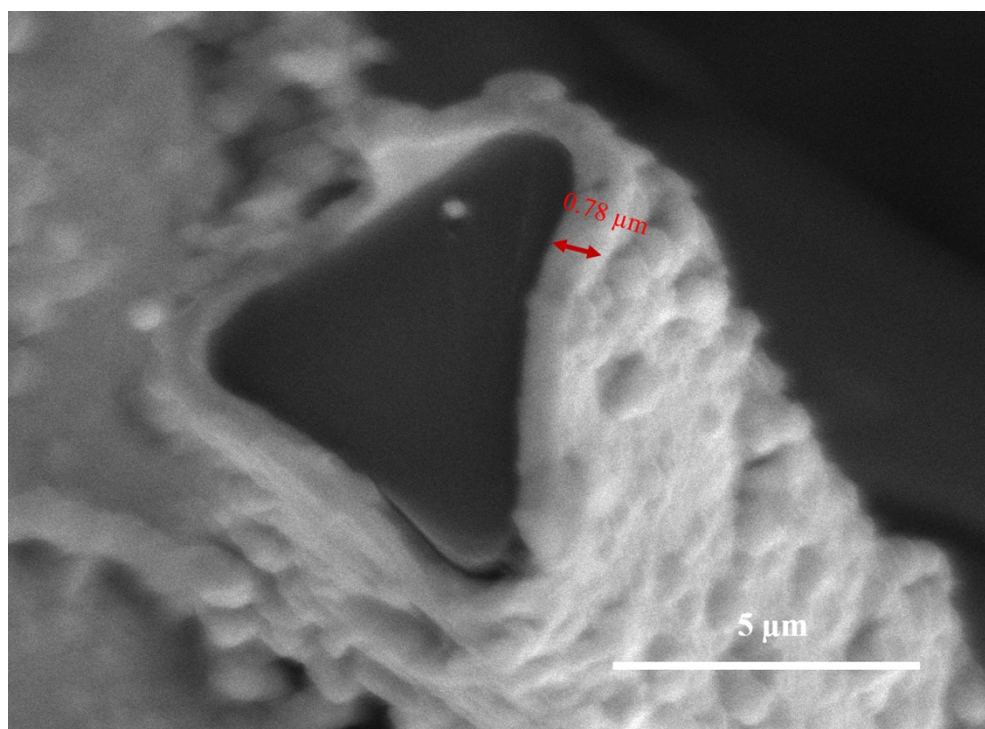

**Fig. S1** SEM image of Ni@MF sponges.

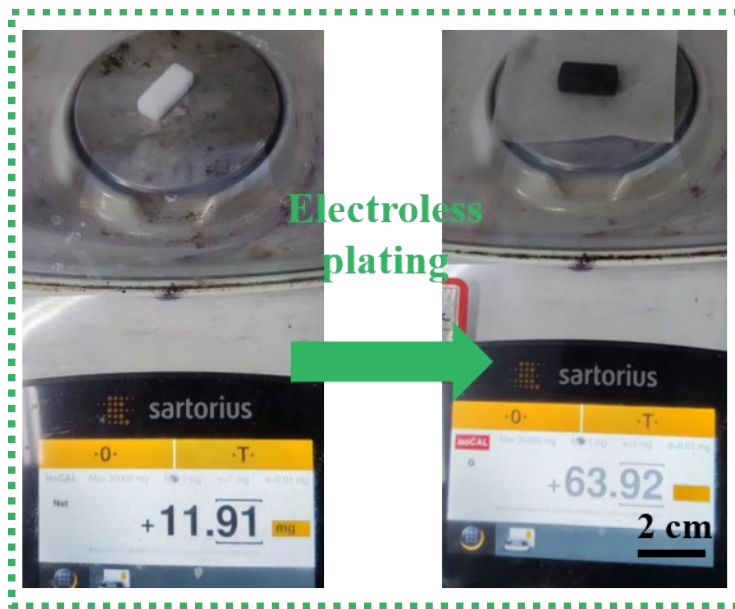

Fig. S2 Digital photos of Ni (left) and Ni@MF (right) on the Precision Balance.

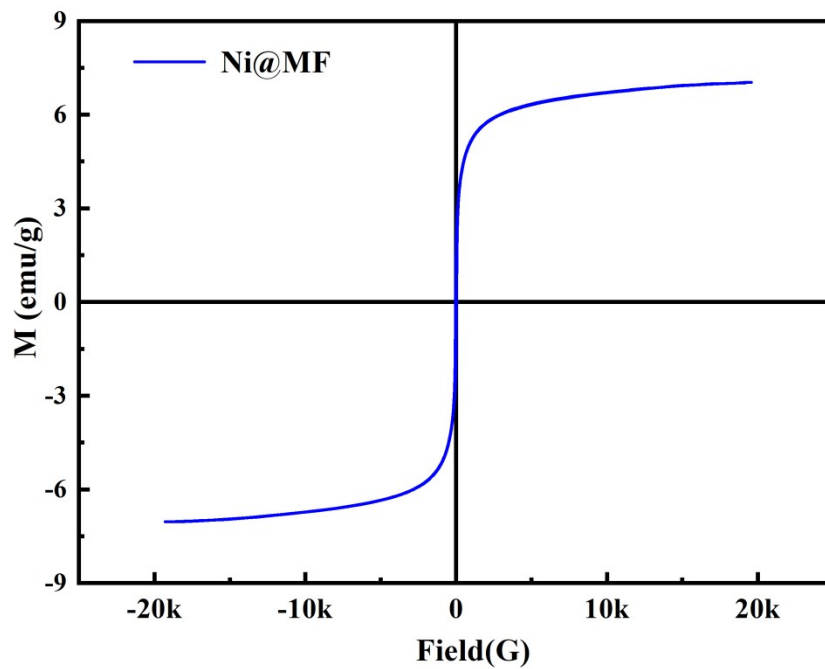

Fig. S1 VSM spectrum of Ni@MF sponges.

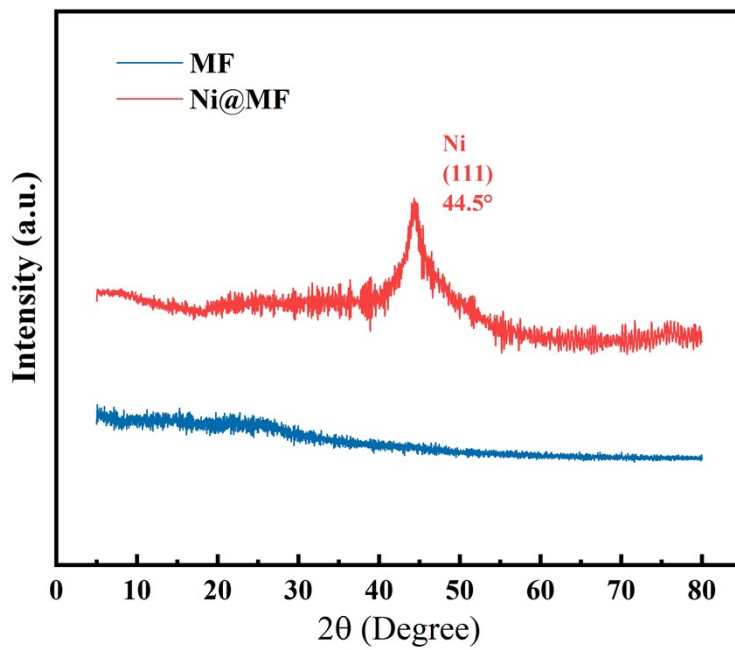

Fig. S4 XRD patterns of MF and Ni@MF sponges.

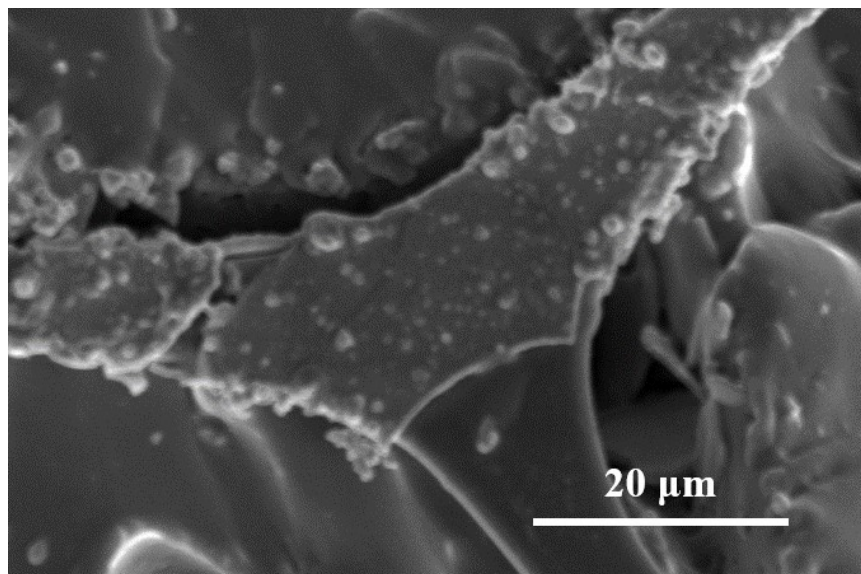

Fig. S5 SEM image of Ni@MF in Ni@MF/CNT<sub>3</sub>/TSM/PDMS composite foam.

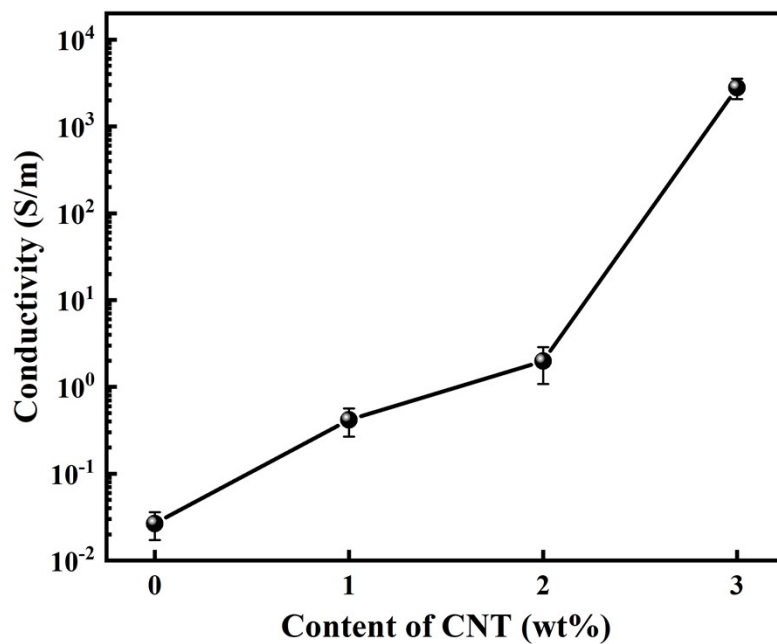

Fig. S6 Electric conductivity of Ni@MF/CNT/TSM/PDMS composite foams with different content of CNT.

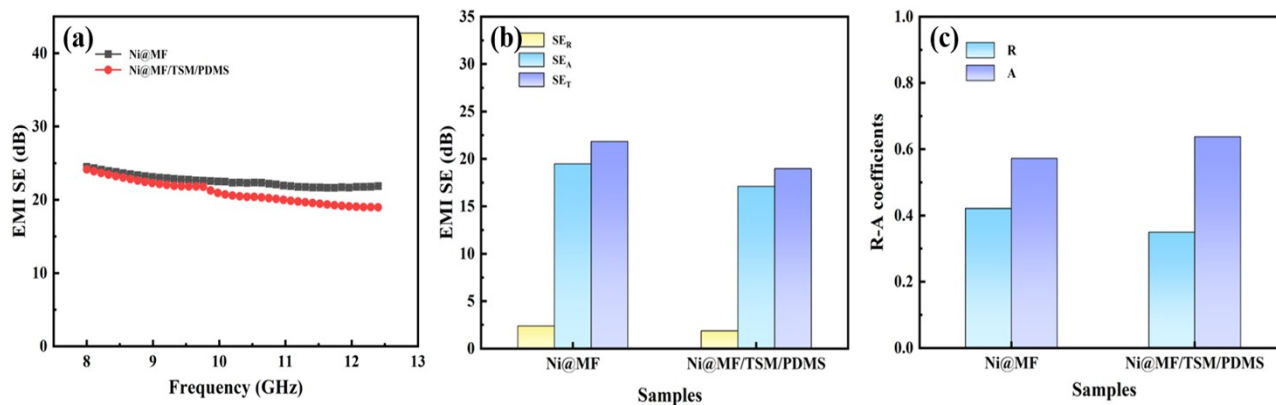

Fig. S7 (a) EMI SE, (b) SE<sub>A</sub>, SE<sub>R</sub>, SE<sub>T</sub>, (c) R-A coefficients of Ni@MF and Ni@MF/TSM/PDMS foams.

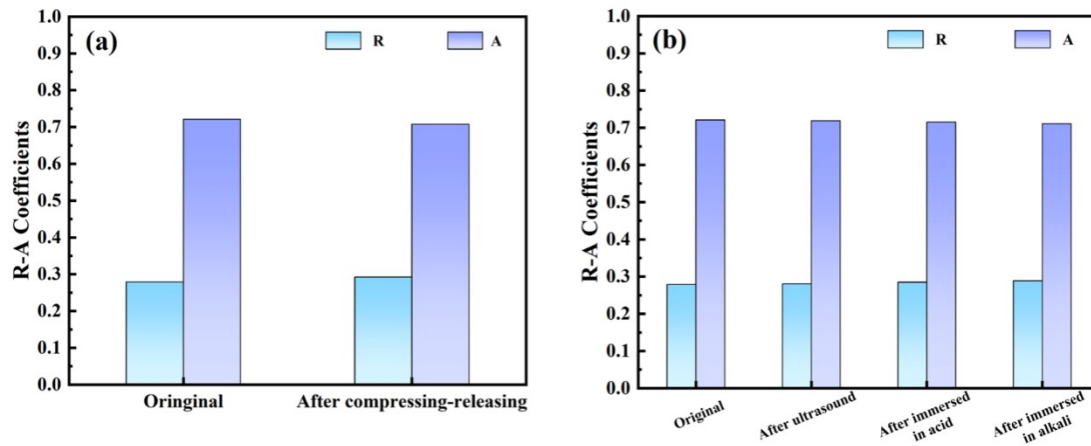

**Fig. S8** R-A coefficients of Ni@MF/CNT<sub>3</sub>/TSM/PDMS composite foams at the frequency of 12.4 GHz after (a) compressing-releasing for 100 cycles, (b) ultrasound for 5 hours, immersed in acidic and alkali solution for 72 hours.
